# Supplementary material
Source: PubMed Central journal article supplement (PMC5340327)

## Supplemental Figure Legends

**Figure S1: Sas3 and Yng1 colocalize genome wide.** A. Scatter plot of Yng1 (Taverna *et al.* 2006) and Sas3 enrichment on 500 bp windows, stepping in 250 bp increments genome wide.

**Figure S2. Sas3 is enriched on sense RNAPII-transcribed genes.** A. Average profiles for NET-seq (Churchman and Weissman 2011) and Sas3 relative to 4701 +1 nucleosome for genes split into quartiles of enrichment of NET-seq signal. Each gene is only included in the average calculation until its polyadenylation signal. The grey line represents the fraction of genes still contributing to the average profile.

**Figure S3: Yng1 is enrichment at methylated nucleosomes.** Yng1 (Taverna *et al.* 2006) enrichment at nucleosome positions enriched or depleted for H3K4me1/2/3 and H3K36me3. Yng1 replicate is indicated by colour.

**Figure S4: Histone methylation and Sas3 at candidate genes.** Input-normalized Sas3 and histone methylation ChIP-seq coverage at *LOS1*, *SEC15*, *NUP145*, and *PUT4* genes. ChIP-qPCR amplicons are indicated by red bars on schematic. ChIP-seq data for histone methylation is from (Weiner *et al.* 2015) and (Sadeh *et al.* 2016).

**Figure S5: H3K4me3 decreases at *RPS28A* when H3K36 methylation is disrupted.** H3K4me3 from wild type and H3K36R strains was quantitatively compared by competitive immunoprecipitation (data from Sadeh *et al.* 2016). The amount of H3K4me3 in wild type and H3K36R at 5' qPCR loci (+100 bp on either side to account for change in resolution) was determined, and the change in methylation is plotted.

**Figure S6: H3K14ac and H3K23ac are enriched 5' of Sas3.** The average enrichment relative to 4701 +1 nucleosomes for Sas3, H3K14ac, and H3K23ac. H3K14ac and H3K23ac data is from (Weiner *et al.* 2015). Each gene is only included in the average calculation until its polyadenylation signal. The fractions of genes still contributing to the average profile are represented by the gray line.

**Figure S7: Modest association between Gcn5 or Sas3 and H3K23ac.** Nucleosome enrichments of H3K23ac before and after TSA treatment split by Sas3 (A) or Gcn5 (B) quartiles and by position relative to the TSS. Gcn5 data is from (Xue-Franzén *et al.* 2013). Nucleosomes from cell-cycle regulated genes were excluded, leaving 33942 nucleosomes from +1 to +10 positions relative to the TSS. Outliers were not plotted.

**Figure S8: Gcn5 and Sas3 enrichment together does not dictate H3K23ac.** Nucleosomes were classified as being enriched or depleted based on being the top or bottom quartile of HAT occupancy respectively. Nucleosomes were grouped as being depleted or enriched for both of Gcn5 or Sas3, enriched for one but not the other, and for not being in one of the above categories. Sas3, Gcn5, and H3K23ac

before and after TSA treatment enrichments for each category were visualized by boxplot. Outliers were not plotted. Gcn5 data is from (Xue-Franzén *et al.* 2013).

**Table S1:** Published *in vitro* dissociation constants for NuA3 and MOZ/MORF histone-PTM binding domains.

**Table S2:** Strains

**Table S3:** CHIP-qPCR primers

**Table S4:** Nucleosome Spearman correlation coefficients.

**Table S1:** Published *in vitro* dissociation constants for NuA3 and MOZ/MORF histone-PTM binding domains.

| Domain          | Peptide      | $K_D$ ( $\mu$ M)             | Reference                                                 |
|-----------------|--------------|------------------------------|-----------------------------------------------------------|
| Yng1 PHD finger | H3K4me3      | 2.3 +/- 0.9,<br>9.1 +/- 1.6  | (Shi <i>et al.</i> 2007),<br>(Taverna <i>et al.</i> 2006) |
|                 | H3K4me2      | 21.4 +/- 3.0                 | (Taverna <i>et al.</i> 2006)                              |
|                 | H3K4me1      | 50.7 +/- 7.6                 | (Taverna <i>et al.</i> 2006)                              |
|                 | H3K4me0      | >400                         | (Taverna <i>et al.</i> 2006)                              |
| Pdp3 PWWP       | H3K36me3     | 69.5 +/- 3.7                 | (Gilbert <i>et al.</i> 2014)                              |
|                 | H3K36me2     | 414 +/- 23                   | (Gilbert <i>et al.</i> 2014)                              |
|                 | H3K36me1     | >1000                        | (Gilbert <i>et al.</i> 2014)                              |
|                 | H3K36me0     | >1000                        | (Gilbert <i>et al.</i> 2014)                              |
|                 | H3K79me3     | 434 +/- 49                   | (Gilbert <i>et al.</i> 2014)                              |
|                 | H4K20me3     | > 1000                       | (Gilbert <i>et al.</i> 2014)                              |
| Taf14 YEATS     | H3K9ac       | 150.6 +/- 14.5               | (Shanle <i>et al.</i> 2015)                               |
|                 | H3K9,14,18ac | 49.9 +/- 2                   | (Shanle <i>et al.</i> 2015)                               |
|                 | H3K9cr       | 9.5 +/- 0.5                  | (Andrews <i>et al.</i> 2016)                              |
| ING5 PHD finger | H3K4me3      | 2.4 +/- 1.0                  | (Champagne <i>et al.</i> 2008)                            |
|                 | H3K4me2      | 16 +/- 1.2                   | (Champagne <i>et al.</i> 2008)                            |
|                 | H3K4me1      | 222 +/- 17                   | (Champagne <i>et al.</i> 2008)                            |
|                 | H3K4me0      | 261 +/- 34                   | (Champagne <i>et al.</i> 2008)                            |
| BRPF1 PWWP      | H3K36me3     | 2700 +/- 200,<br>2900 - 4000 | (Vezzoli <i>et al.</i> 2010),<br>(Wu <i>et al.</i> 2011)  |
|                 | H3K36me2     | very weak                    | (Wu <i>et al.</i> 2011)                                   |
|                 | H3K36me0     | NB                           | (Wu <i>et al.</i> 2011)                                   |
|                 | H3K4me3      | NB                           | (Wu <i>et al.</i> 2011)                                   |
|                 | H3K79me3     | very weak                    | (Wu <i>et al.</i> 2011)                                   |
|                 | H3K9me3      | NB                           | (Wu <i>et al.</i> 2011)                                   |

**Table S2:** Strains

| Strain | Parent          | Mating type                   | Genotype                                                                                        | Source               |
|--------|-----------------|-------------------------------|-------------------------------------------------------------------------------------------------|----------------------|
| YLH101 | FY602           | Mat a                         | <i>his3D200 leu2D1 lys2-128d ura3-52 trp1D63</i>                                                |                      |
| YVM138 | YLH101          | Mat a                         | <i>his3D200 leu2D1 lys2-128d ura3-52 trp1D63 SAS3-6HA::TRP</i>                                  |                      |
| YVM142 | YLR008 x YLH354 | Mat a                         | <i>his3D200 leu2D1 lys2-128d ura3-52 trp1D63 SAS3-6HA::HIS set1Δ::KANMX6 set2Δ::TRP</i>         |                      |
| YVM147 | YVM144          | Mat a                         | <i>his3D200 leu2D1 lys2-128d ura3-52 trp1D63 SAS3-6HA::TRP yng1ΔPHD::KANMX6</i>                 |                      |
| YVM157 | YVM146          | Mat a                         | <i>his3D200 leu2D1 lys2-128d ura3-52 trp1D63 SAS3-6HA::TRP set1Δ::HISMX6</i>                    |                      |
| YVM158 | YVM146          | Mat a                         | <i>his3D200 leu2D1 lys2-128d ura3-52 trp1D63 SAS3-6HA::TRP set2Δ::HISMX6</i>                    |                      |
| YVM207 | YVM146          | Mat a                         | <i>his3D200 leu2D1 lys2-128d ura3-52 trp1D63 SAS3-6HA::TRP ylr455w::HIS</i>                     |                      |
| YLH696 | YVM147          | Mat a                         | <i>his3D200 leu2D1 lys2-128d ura3-52 trp1D63 SAS3-6HA::TRP yng1DPHD::KANMX6 ylr455w::HISMX6</i> |                      |
| YLH787 | YLH101          | Mat a                         | <i>his3D200 leu2D1 lys2-128d ura3-52 trp1D63 bar1::KAN</i>                                      |                      |
| FY2173 |                 | <i>MAT<math>\alpha</math></i> | <i>his3Δ200 leu2Δ1 lys2-128Δ trp1Δ63 ura3-52 kanMX-GAL1pr-FLO8-HIS3</i>                         | (Cheung et al. 2008) |
| L1106  |                 | Mat a                         | <i>his3Δ200 ura3Δ0 kanMX-GAL1pr-FLO8-HIS3 rco1Δ0::kanMX</i>                                     | (Cheung et al. 2008) |
| YLH510 | L1106           | Mat a                         | <i>his3Δ200 ura3Δ0 kanMX-GAL1pr-FLO8-HIS3 rco1Δ0::kanMX sas3::URA3</i>                          |                      |

**Table S3: ChIP-qPCR primers**

| qPCR primer   | Sequence (5' to 3')      |
|---------------|--------------------------|
| NUP145 s+3214 | GTATCTTCTGCTGCCTTGTCATC  |
| NUP145 a+3335 | CGAAGGAACTAGCGATGAGG     |
| NUP145 a+1611 | CATTGGTTTGGTGGCTTCGTC    |
| NUP145 s+1488 | CAACATGATGTGGATCTCACAGC  |
| NUP145 a+281  | GTAGCGCCAAATAAGCCACC     |
| NUP145 s+148  | CTTCAACACCTAGCCCATCTGG   |
| SEC15 a+2230  | GACCCATGAATTGTCTCGTCAAGG |
| SEC15 s+2082  | GTAAGGCAAGACCCGGATATCTC  |
| SEC15 a+1312  | GTGACAACCTGTCCATGAGTC    |
| SEC15 s+1092  | GGTACAGGTACTACTCCTGGATC  |
| SEC15 a+370   | GCACCATACCTGGATGTTTGC    |
| SEC15 s+230   | GGACCCCGTAATTGATGAATTGG  |
| LOS1 a+1395   | CAGACTTGGGTCAATTACCACG   |
| LOS1 a+2940   | GTCGTCATTATCCAAGCAGGTCC  |
| LOS1 s+2831   | CTATACGCCGCAAGAGATCCAG   |
| LOS1 s+1301   | GGTCACACAGGATGATTTTGAGG  |
| LOS1 a+230    | CCATTTGGATTAGCGTTCACGC   |
| LOS1 s+69     | CAAGCCATCGAGCTGCTAAATG   |
| PUT4 a+714    | CACGCATAGAAAGATCGTGATCC  |
| PUT4 s+546    | CTGGTCACTAGGTACGTTGAC    |
| RPS28A s + 15 | CCAGTCACTTTAGCCAAGGTC    |
| RPS28A a +191 | CGAGCTTCACGTTCAGATTCC    |

**Supplemental References:**

Andrews F. H., Shinsky S. A., Shanle E. K., Bridgers J. B., Gest A., Tsun I. K., Krajewski K., Shi X., Strahl B. D., Kutateladze T. G., 2016 The Taf14 YEATS domain is a reader of histone crotonylation. *Nature Chemical Biology* **12**: 396–398.

Champagne K. S., Saksouk N., Peña P. V., Johnson K., Ullah M., Yang X.-J., Côté J., Kutateladze T. G., 2008 The crystal structure of the ING5 PHD finger in complex with an H3K4me3 histone peptide. *Proteins* **72**: 1371–1376.

Cheung V., Chua G., Batada N. N., Landry C. R., Michnick S. W., Hughes T. R., Winston F., 2008 Chromatin- and transcription-related factors repress transcription from within coding regions throughout the *Saccharomyces cerevisiae* genome. *PLoS*

Biol **6**: e277.

- Churchman L. S., Weissman J. S., 2011 Nascent transcript sequencing visualizes transcription at nucleotide resolution. *Nature* **469**: 368–373.
- Gilbert T. M., McDaniel S. L., Byrum S. D., Cades J. A., Dancy B. C. R., Wade H., Tackett A. J., Strahl B. D., Taverna S. D., 2014 A PWWP domain-containing protein targets the NuA3 acetyltransferase complex via histone H3 lysine 36 trimethylation to coordinate transcriptional elongation at coding regions. *Mol. Cell Proteomics* **13**: 2883–2895.
- Sadeh R., Launer-Wachs R., Wandel H., Rahat A., Friedman N., 2016 Elucidating Combinatorial Chromatin States at Single-Nucleosome Resolution. *Molecular Cell*: 1–24.
- Shanle E. K., Andrews F. H., Meriesh H., McDaniel S. L., Dronamraju R., DiFiore J. V., Jha D., Wozniak G. G., Bridgers J. B., Kerschner J. L., Krajewski K., Martín G. M., Morrison A. J., Kutateladze T. G., Strahl B. D., 2015 Association of Taf14 with acetylated histone H3 directs gene transcription and the DNA damage response. *Genes Dev.* **29**: 1795–1800.
- Shi X., Kachirskaja I., Walter K. L., Kuo J.-H. A., Lake A., Davrazou F., Chan S. M., Martin D. G. E., Fingerman I. M., Briggs S. D., Howe L., Utz P. J., Kutateladze T. G., Lugovskoy A. A., Bedford M. T., Gozani O., 2007 Proteome-wide analysis in *Saccharomyces cerevisiae* identifies several PHD fingers as novel direct and selective binding modules of histone H3 methylated at either lysine 4 or lysine 36. *J. Biol. Chem.* **282**: 2450–2455.
- Taverna S. D., Ilin S., Rogers R. S., Tanny J. C., Lavender H., Li H., Baker L., Boyle J., Blair L. P., Chait B. T., Patel D. J., Aitchison J. D., Tackett A. J., Allis C. D., 2006 Yng1 PHD finger binding to H3 trimethylated at K4 promotes NuA3 HAT activity at K14 of H3 and transcription at a subset of targeted ORFs. *Molecular Cell* **24**: 785–796.
- Vezzoli A., Bonadies N., Allen M. D., Freund S. M. V., Santiveri C. M., Kvinlaug B. T., Huntly B. J. P., Göttgens B., Bycroft M., 2010 Molecular basis of histone H3K36me3 recognition by the PWWP domain of Brpf1. *Nat. Struct. Mol. Biol.* **17**: 617–619.
- Weiner A., Hsieh T.-H. S., Appleboim A., Chen H. V., Rahat A., Amit I., Rando O. J., Friedman N., 2015 High-resolution chromatin dynamics during a yeast stress response. *Molecular Cell* **58**: 371–386.
- Wu H., Zeng H., Lam R., Tempel W., Amaya M. F., Xu C., Dombrowski L., Qiu W., Wang Y., Min J., 2011 Structural and histone binding ability characterizations of human PWWP domains. *PLoS ONE* **6**: e18919.

Xue-Franzén Y., Henriksson J., Bürklin T. R., Wright A. P. H., 2013 Distinct roles of the Gcn5 histone acetyltransferase revealed during transient stress-induced reprogramming of the genome. *BMC Genomics* **14**: 479.

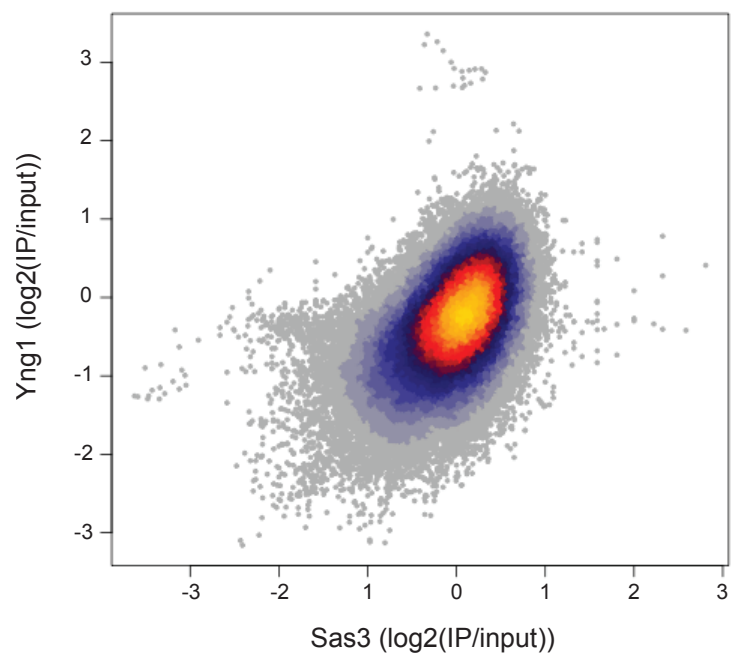



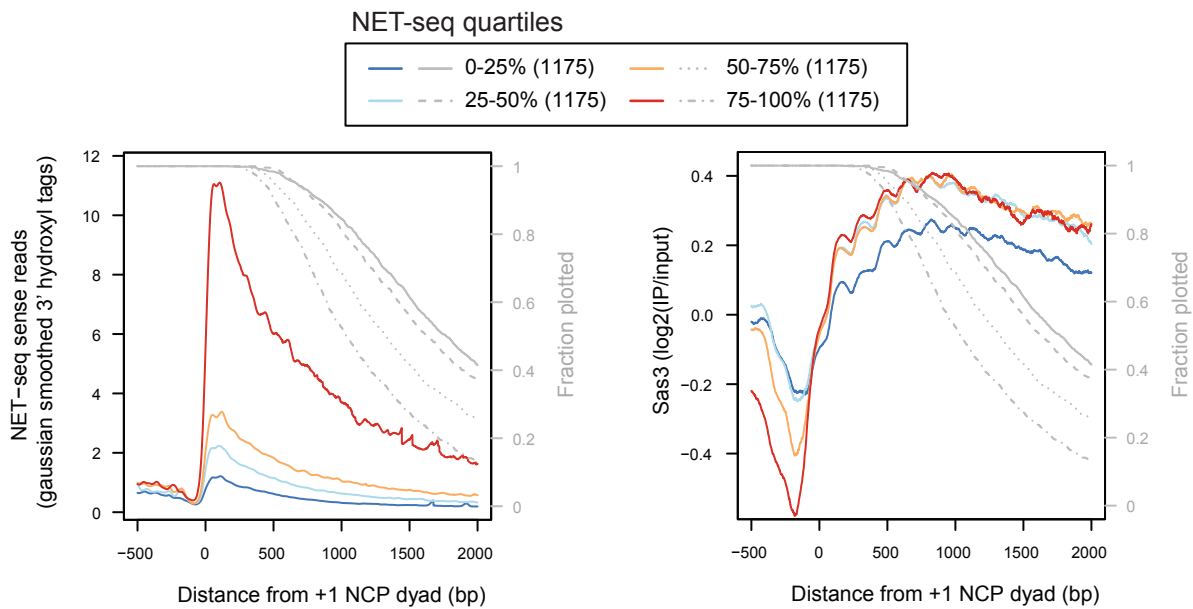

Figure S3

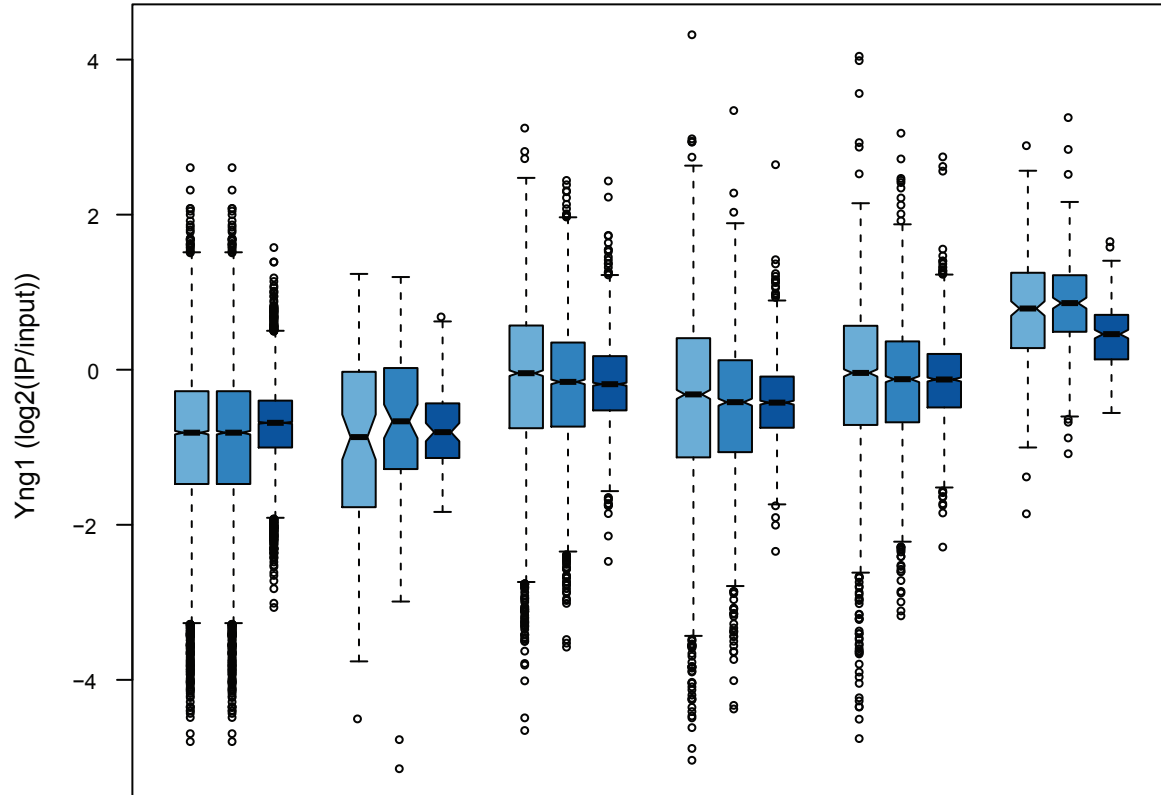

|           |      |    |      |      |      |     |
|-----------|------|----|------|------|------|-----|
| H3K4me1   | -    | +  | -    | -    | +    | -   |
| H3K4me2   | -    | -  | -    | -    | -    | -   |
| H3K4me3   | -    | -  | +    | -    | -    | +   |
| H3K36me3  | -    | -  | -    | +    | +    | +   |
| # of NCPs | 7117 | 90 | 3349 | 1764 | 1849 | 273 |

Figure S4

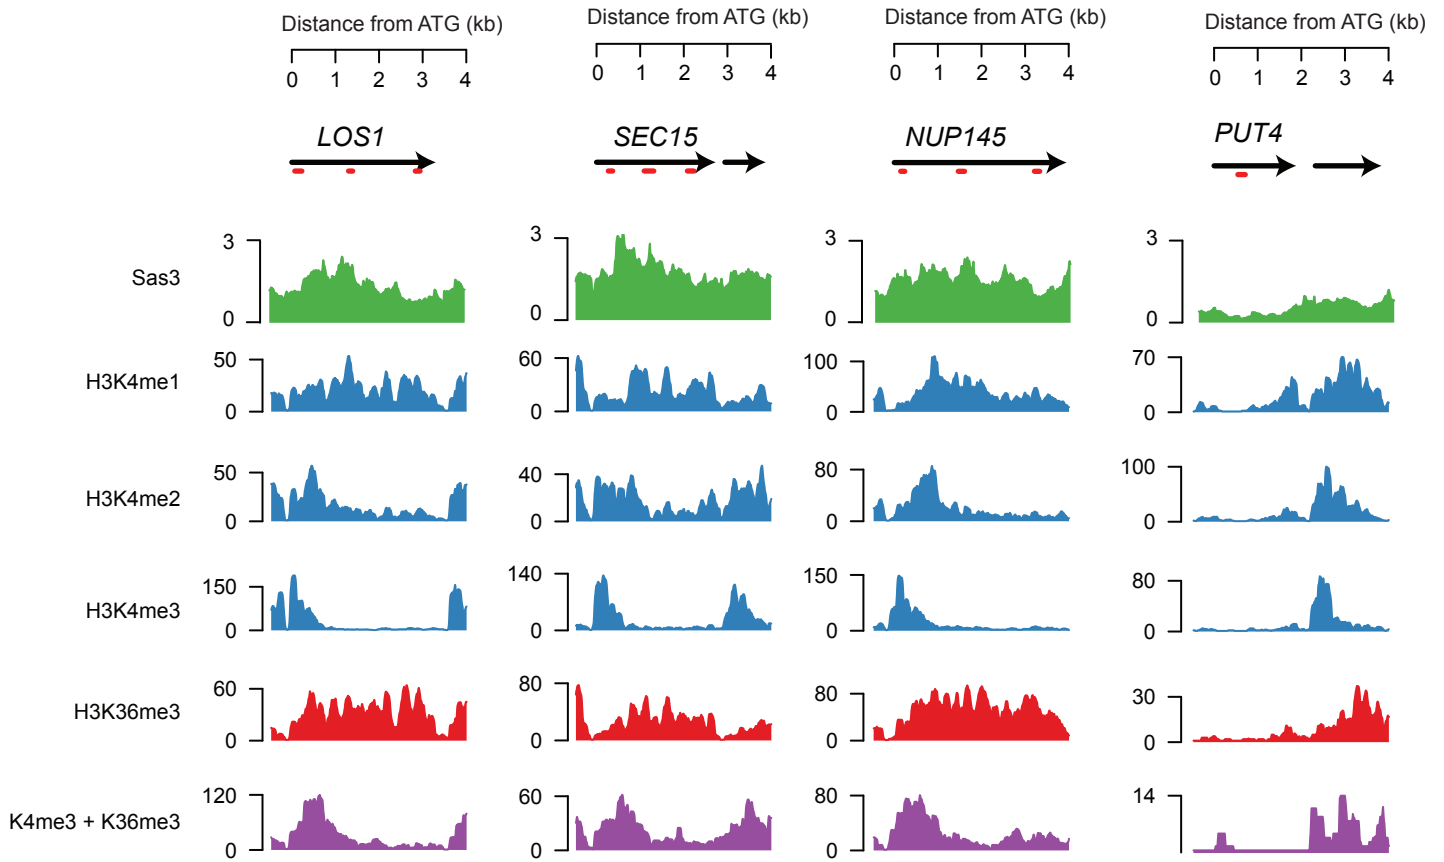

Figure S5

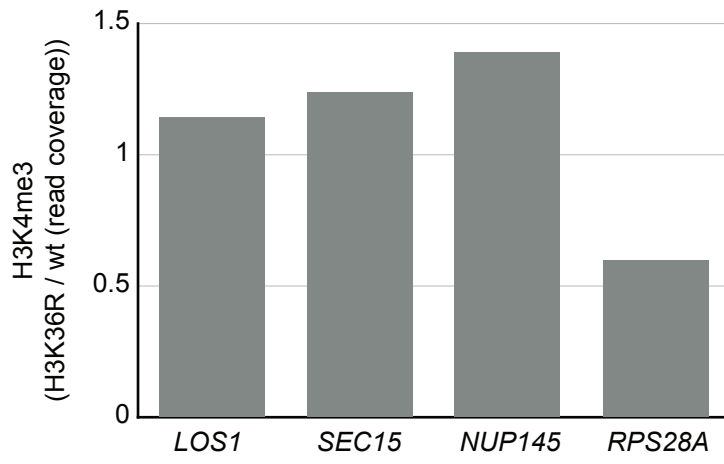

Figure S6

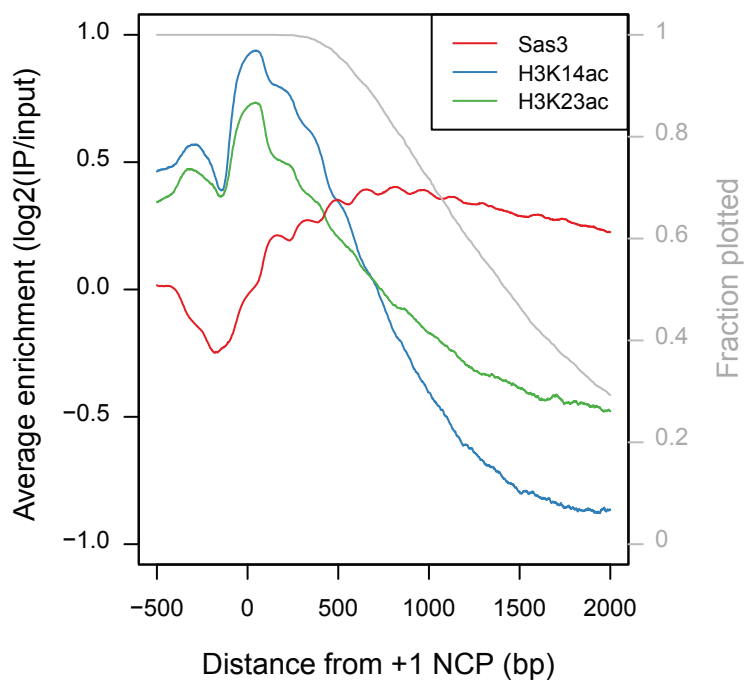

A

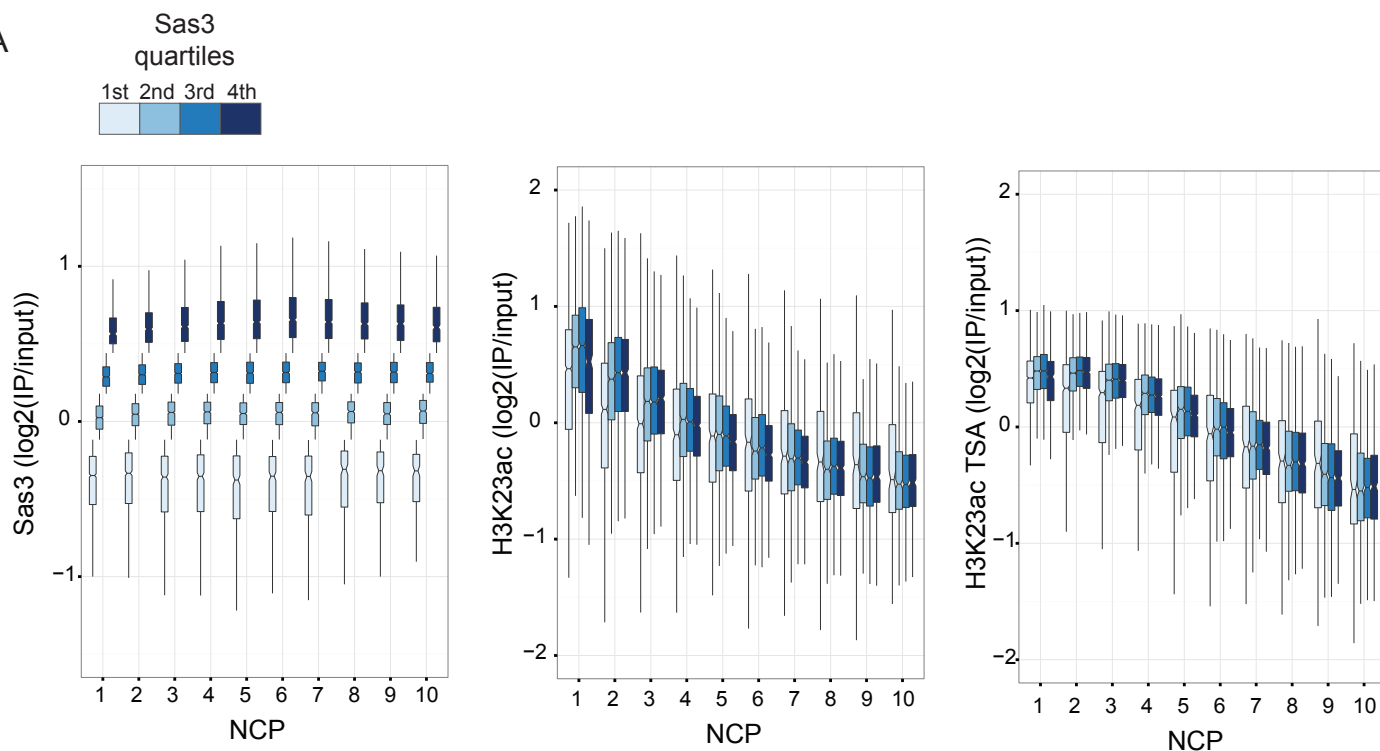

B

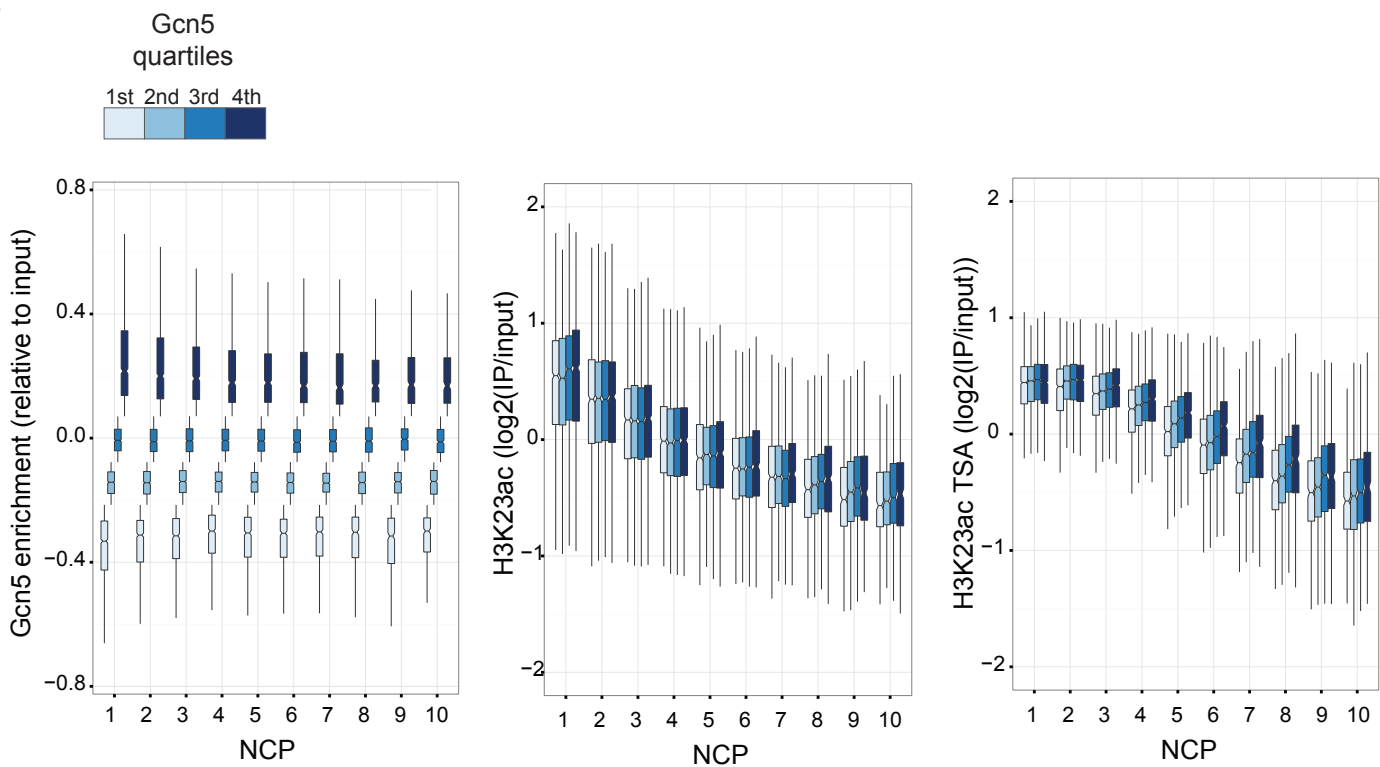

Figure S8

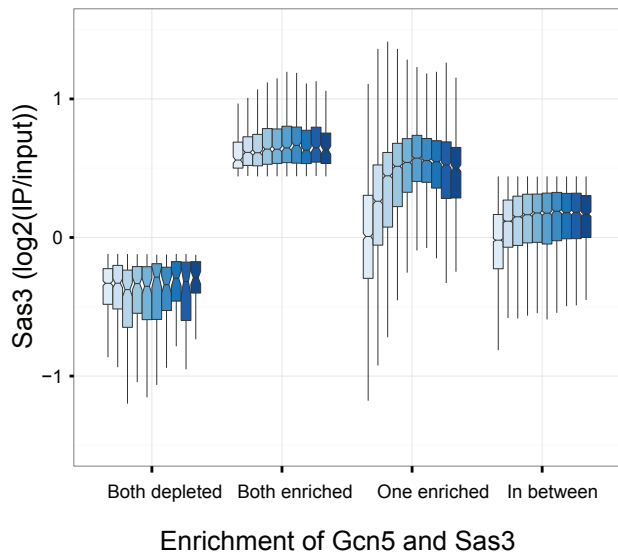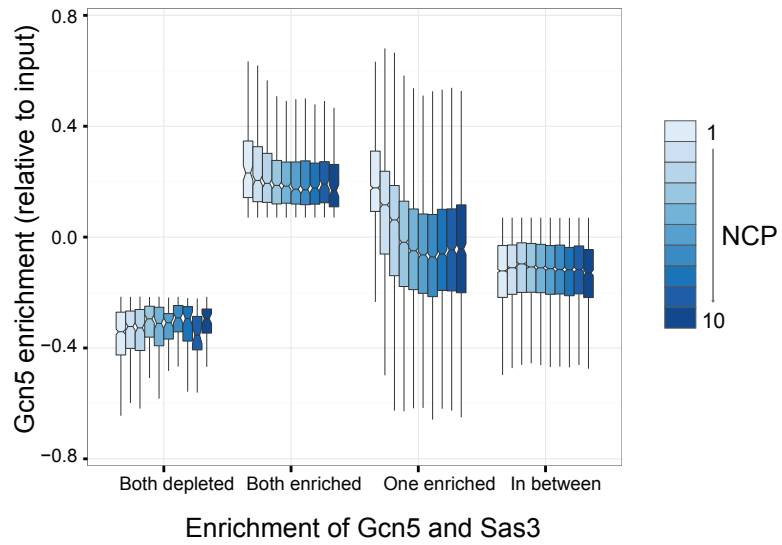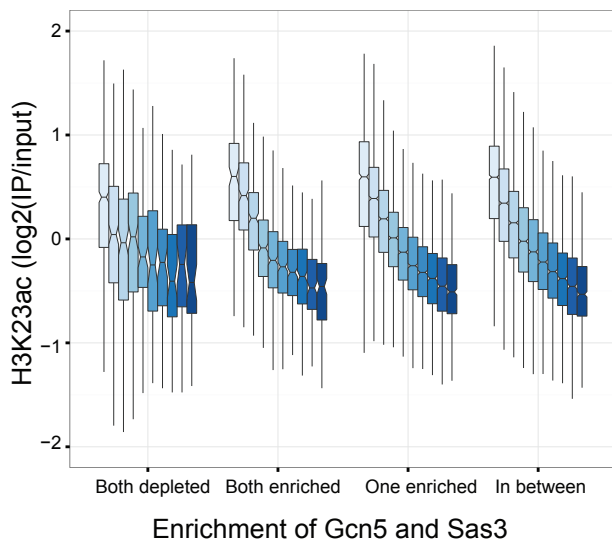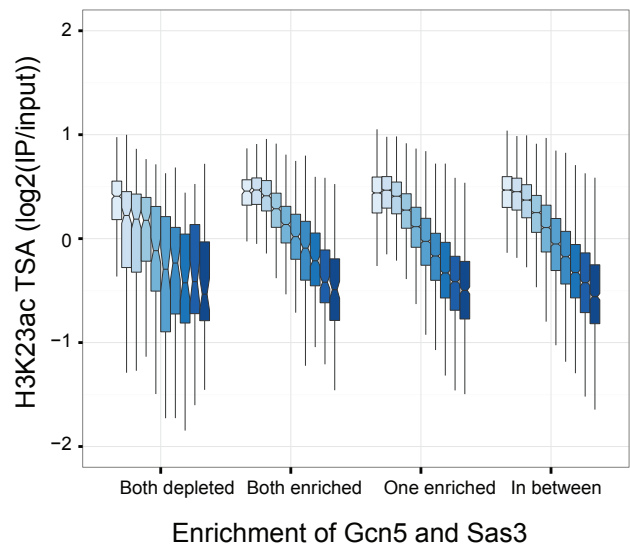

Supplement: 1113FileS1.pdf [file 1113FileS1.pdf]
