# Supplementary material
Source: PubMed Central journal article supplement (PMC5340327)
Supplement: 1113TableS1.pdf [file 1113TableS1.pdf]

**Table S1:** Published *in vitro* dissociation constants for NuA3 and MOZ/MORF histone-PTM binding domains.

| Domain          | Peptide      | $K_D$ ( $\mu\text{M}$ )      | Reference                                                 |
|-----------------|--------------|------------------------------|-----------------------------------------------------------|
| Yng1 PHD finger | H3K4me3      | 2.3 +/- 0.9,<br>9.1 +/- 1.6  | (Shi <i>et al.</i> 2007),<br>(Taverna <i>et al.</i> 2006) |
|                 | H3K4me2      | 21.4 +/- 3.0                 | (Taverna <i>et al.</i> 2006)                              |
|                 | H3K4me1      | 50.7 +/- 7.6                 | (Taverna <i>et al.</i> 2006)                              |
|                 | H3K4me0      | >400                         | (Taverna <i>et al.</i> 2006)                              |
| Pdp3 PWWP       | H3K36me3     | 69.5 +/- 3.7                 | (Gilbert <i>et al.</i> 2014)                              |
|                 | H3K36me2     | 414 +/- 23                   | (Gilbert <i>et al.</i> 2014)                              |
|                 | H3K36me1     | >1000                        | (Gilbert <i>et al.</i> 2014)                              |
|                 | H3K36me0     | >1000                        | (Gilbert <i>et al.</i> 2014)                              |
|                 | H3K79me3     | 434 +/- 49                   | (Gilbert <i>et al.</i> 2014)                              |
|                 | H4K20me3     | > 1000                       | (Gilbert <i>et al.</i> 2014)                              |
| Taf14 YEATS     | H3K9ac       | 150.6 +/- 14.5               | (Shanle <i>et al.</i> 2015)                               |
|                 | H3K9,14,18ac | 49.9 +/- 2                   | (Shanle <i>et al.</i> 2015)                               |
|                 | H3K9cr       | 9.5 +/- 0.5                  | (Andrews <i>et al.</i> 2016)                              |
| ING5 PHD finger | H3K4me3      | 2.4 +/- 1.0                  | (Champagne <i>et al.</i> 2008)                            |
|                 | H3K4me2      | 16 +/- 1.2                   | (Champagne <i>et al.</i> 2008)                            |
|                 | H3K4me1      | 222 +/- 17                   | (Champagne <i>et al.</i> 2008)                            |
|                 | H3K4me0      | 261 +/- 34                   | (Champagne <i>et al.</i> 2008)                            |
| BRPF1 PWWP      | H3K36me3     | 2700 +/- 200,<br>2900 - 4000 | (Vezzoli <i>et al.</i> 2010),<br>(Wu <i>et al.</i> 2011)  |
|                 | H3K36me2     | very weak                    | (Wu <i>et al.</i> 2011)                                   |
|                 | H3K36me0     | NB                           | (Wu <i>et al.</i> 2011)                                   |
|                 | H3K4me3      | NB                           | (Wu <i>et al.</i> 2011)                                   |
|                 | H3K79me3     | very weak                    | (Wu <i>et al.</i> 2011)                                   |
|                 | H3K9me3      | NB                           | (Wu <i>et al.</i> 2011)                                   |
