# Supplementary material
Source: PubMed Central journal article supplement (PMC5340327)
Supplement: 1113TableS2.pdf [file 1113TableS2.pdf]

**Table S2: Strains**

| Strain | Parent          | Mating type                   | Genotype                                                                                        | Source                      |
|--------|-----------------|-------------------------------|-------------------------------------------------------------------------------------------------|-----------------------------|
| YLH101 | FY602           | Mat a                         | <i>his3D200 leu2D1 lys2-128d ura3-52 trp1D63</i>                                                |                             |
| YVM138 | YLH101          | Mat a                         | <i>his3D200 leu2D1 lys2-128d ura3-52 trp1D63 SAS3-6HA::TRP</i>                                  |                             |
| YVM142 | YLR008 x YLH354 | Mat a                         | <i>his3D200 leu2D1 lys2-128d ura3-52 trp1D63 SAS3-6HA::HIS set1Δ::KANMX6 set2Δ::TRP</i>         |                             |
| YVM147 | YVM144          | Mat a                         | <i>his3D200 leu2D1 lys2-128d ura3-52 trp1D63 SAS3-6HA::TRP yng1ΔPHD::KANMX6</i>                 |                             |
| YVM157 | YVM146          | Mat a                         | <i>his3D200 leu2D1 lys2-128d ura3-52 trp1D63 SAS3-6HA::TRP set1Δ::HISMX6</i>                    |                             |
| YVM158 | YVM146          | Mat a                         | <i>his3D200 leu2D1 lys2-128d ura3-52 trp1D63 SAS3-6HA::TRP set2Δ::HISMX6</i>                    |                             |
| YVM207 | YVM146          | Mat a                         | <i>his3D200 leu2D1 lys2-128d ura3-52 trp1D63 SAS3-6HA::TRP ylr455w::HIS</i>                     |                             |
| YLH696 | YVM147          | Mat a                         | <i>his3D200 leu2D1 lys2-128d ura3-52 trp1D63 SAS3-6HA::TRP yng1DPHD::KANMX6 ylr455w::HISMX6</i> |                             |
| YLH787 | YLH101          | Mat a                         | <i>his3D200 leu2D1 lys2-128d ura3-52 trp1D63 bar1::KAN</i>                                      |                             |
| FY2173 |                 | <i>MAT<math>\alpha</math></i> | <i>his3Δ200 leu2Δ1 lys2-128Δ trp1Δ63 ura3-52 kanMX-GAL1pr-FLO8-HIS3</i>                         | (Cheung <i>et al.</i> 2008) |
| L1106  |                 | Mat a                         | <i>his3Δ200 ura3Δ0 kanMX-GAL1pr-FLO8-HIS3 rco1Δ0::kanMX</i>                                     | (Cheung <i>et al.</i> 2008) |
| YLH510 | L1106           | Mat a                         | <i>his3Δ200 ura3Δ0 kanMX-GAL1pr-FLO8-HIS3 rco1Δ0::kanMX sas3::URA3</i>                          |                             |
