# Supplementary material
Source: PubMed Central journal article supplement (PMC5340327)
Supplement: 1113TableS3.pdf [file 1113TableS3.pdf]

**Table S3:** ChIP-qPCR primers

| qPCR primer   | Sequence (5' to 3')      |
|---------------|--------------------------|
| NUP145 s+3214 | GTATCTTCTGCTGCCTTGTCATC  |
| NUP145 a+3335 | CGAAGGAACTAGCGATGAGG     |
| NUP145 a+1611 | CATTGGTTTGGTGGCTTCGTC    |
| NUP145 s+1488 | CAACATGATGTGGATCTCACAGC  |
| NUP145 a+281  | GTAGCGCCAAATAAGCCACC     |
| NUP145 s+148  | CTTCAACACCTAGCCCATCTGG   |
| SEC15 a+2230  | GACCCATGAATTGTCTCGTCAAGG |
| SEC15 s+2082  | GTAAGGCAAGACCCGGATATCTC  |
| SEC15 a+1312  | GTGACAACCTGTCCATGAGTC    |
| SEC15 s+1092  | GGTACAGGTACTACTCCTGGATC  |
| SEC15 a+370   | GCACCATACCTGGATGTTTGC    |
| SEC15 s+230   | GGACCCCGTAATTGATGAATTGG  |
| LOS1 a+1395   | CAGACTTGGGTCAATTACCACG   |
| LOS1 a+2940   | GTCGTCATTATCCAAGCAGGTCC  |
| LOS1 s+2831   | CTATACGCCGCAAGAGATCCAG   |
| LOS1 s+1301   | GGTCACACAGGATGATTTTGAGG  |
| LOS1 a+230    | CCATTTGGATTAGCGTTCACGC   |
| LOS1 s+69     | CAAGCCATCGAGCTGCTAAATG   |
| PUT4 a+714    | CACGCATAGAAAGATCGTGATCC  |
| PUT4 s+546    | CTGGTCACTAGGTACGTTGAC    |
| RPS28A s + 15 | CCAGTCACTTTAGCCAAGGTC    |
| RPS28A a +191 | CGAGCTTCAGTTCAGATTCC     |
