# Supplementary material
Source: PubMed Central journal article supplement (PMC5340327)

Figure S1

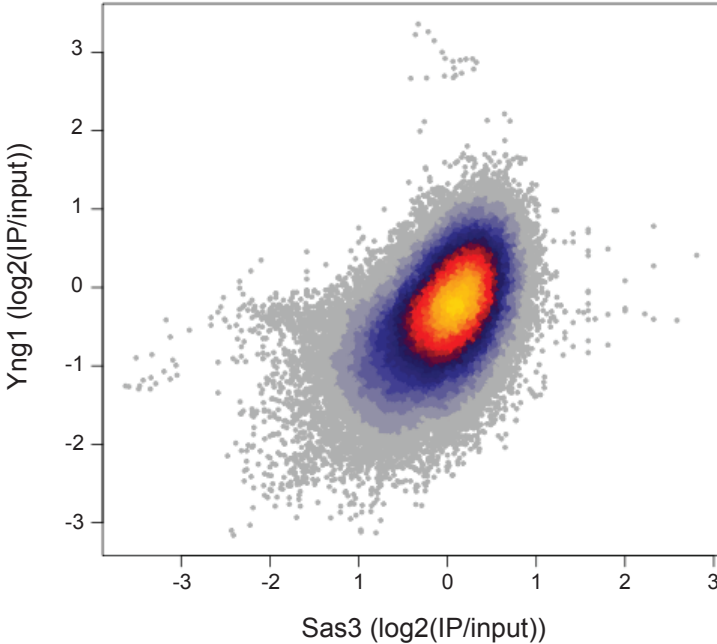

Supplement: 1113FigureS1.pdf [file 1113FigureS1.pdf]

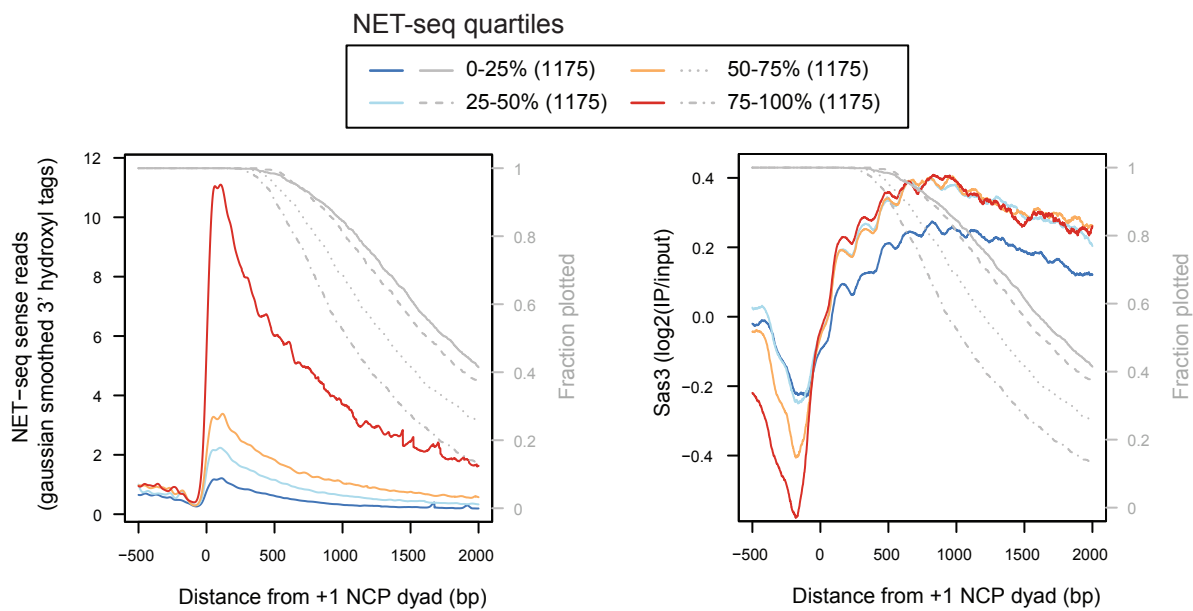

Supplement: 1113FigureS2.pdf [file 1113FigureS2.pdf]

Figure S3

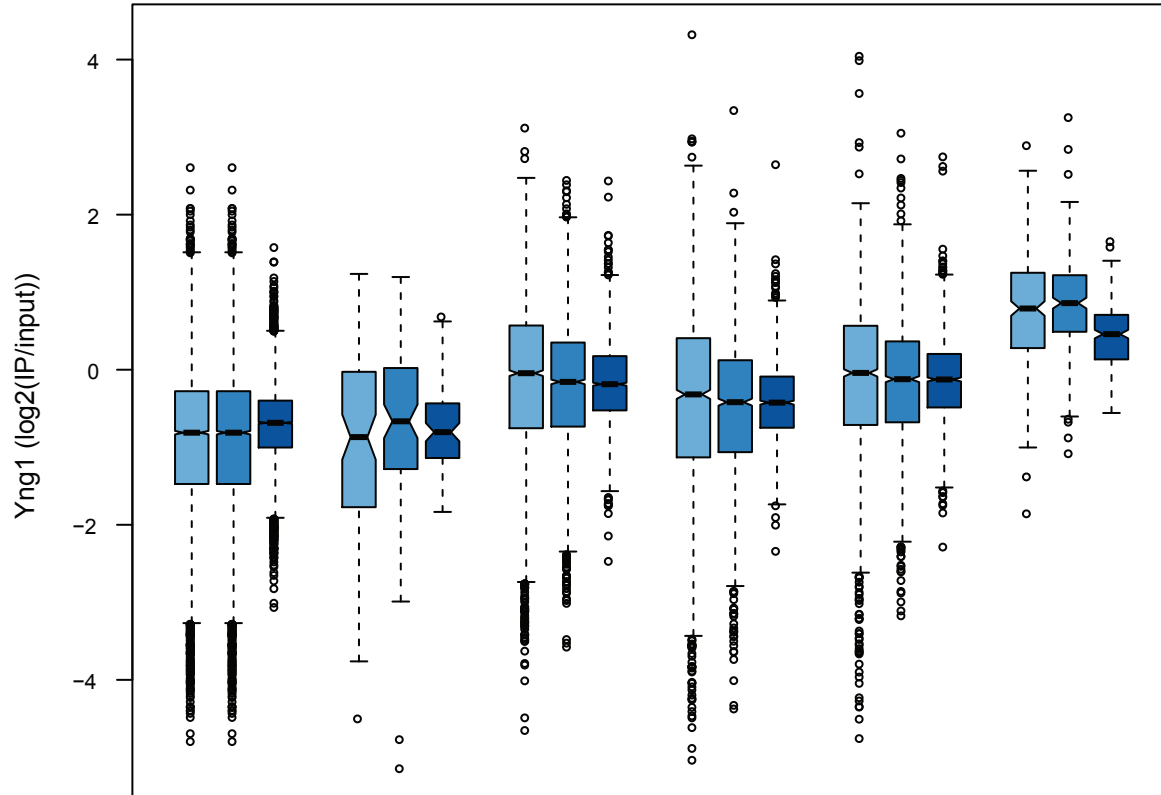

|           |      |    |      |      |      |     |
|-----------|------|----|------|------|------|-----|
| H3K4me1   | -    | +  | -    | -    | +    | -   |
| H3K4me2   | -    | -  | -    | -    | -    | -   |
| H3K4me3   | -    | -  | +    | -    | -    | +   |
| H3K36me3  | -    | -  | -    | +    | +    | +   |
| # of NCPs | 7117 | 90 | 3349 | 1764 | 1849 | 273 |

Supplement: 1113FigureS3.pdf [file 1113FigureS3.pdf]

Figure S4

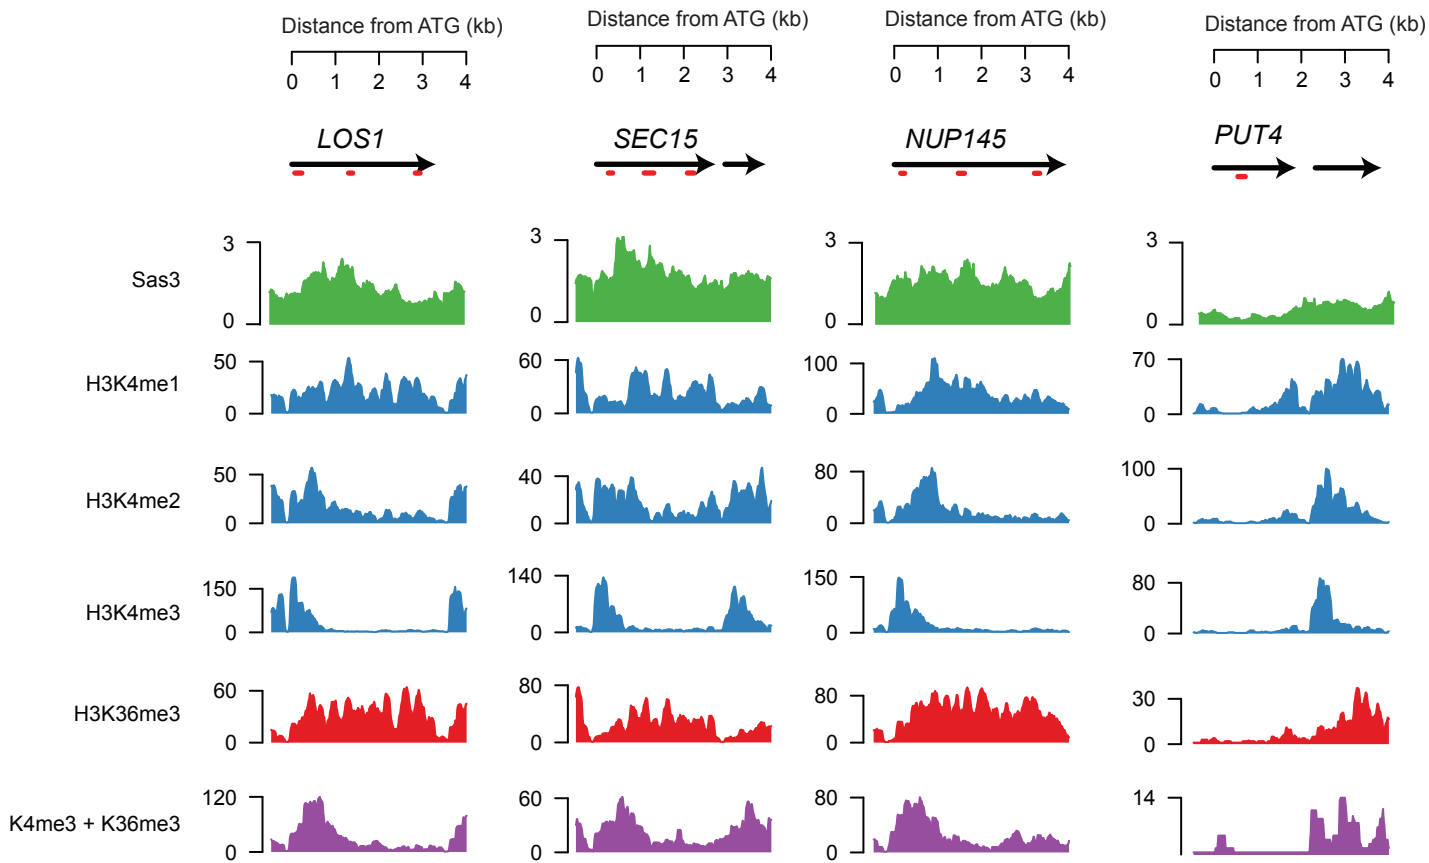

Supplement: 1113FigureS4.pdf [file 1113FigureS4.pdf]

Figure S5

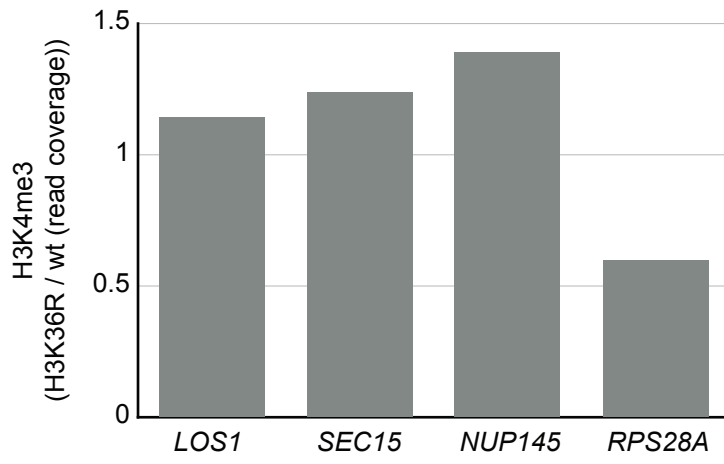

Supplement: 1113FigureS5.pdf [file 1113FigureS5.pdf]

Figure S6

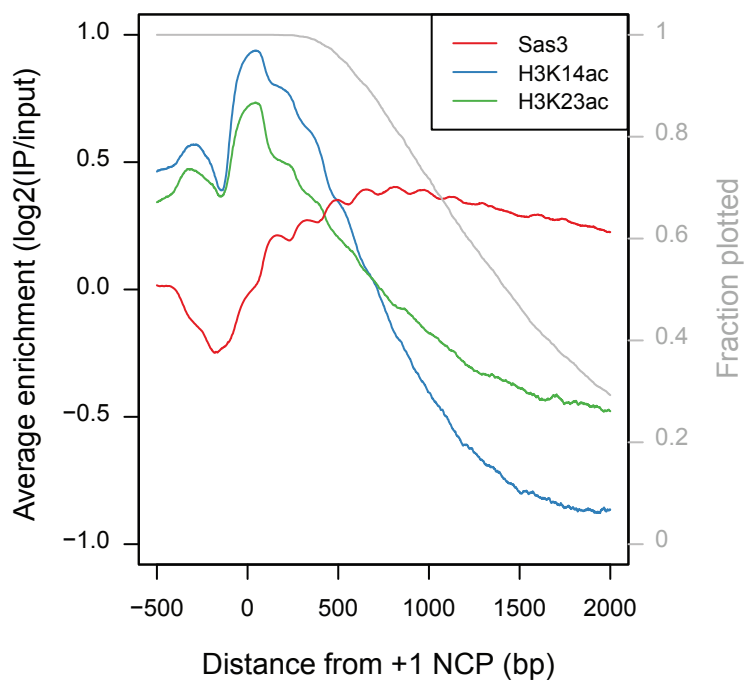

Supplement: 1113FigureS6.pdf [file 1113FigureS6.pdf]

A

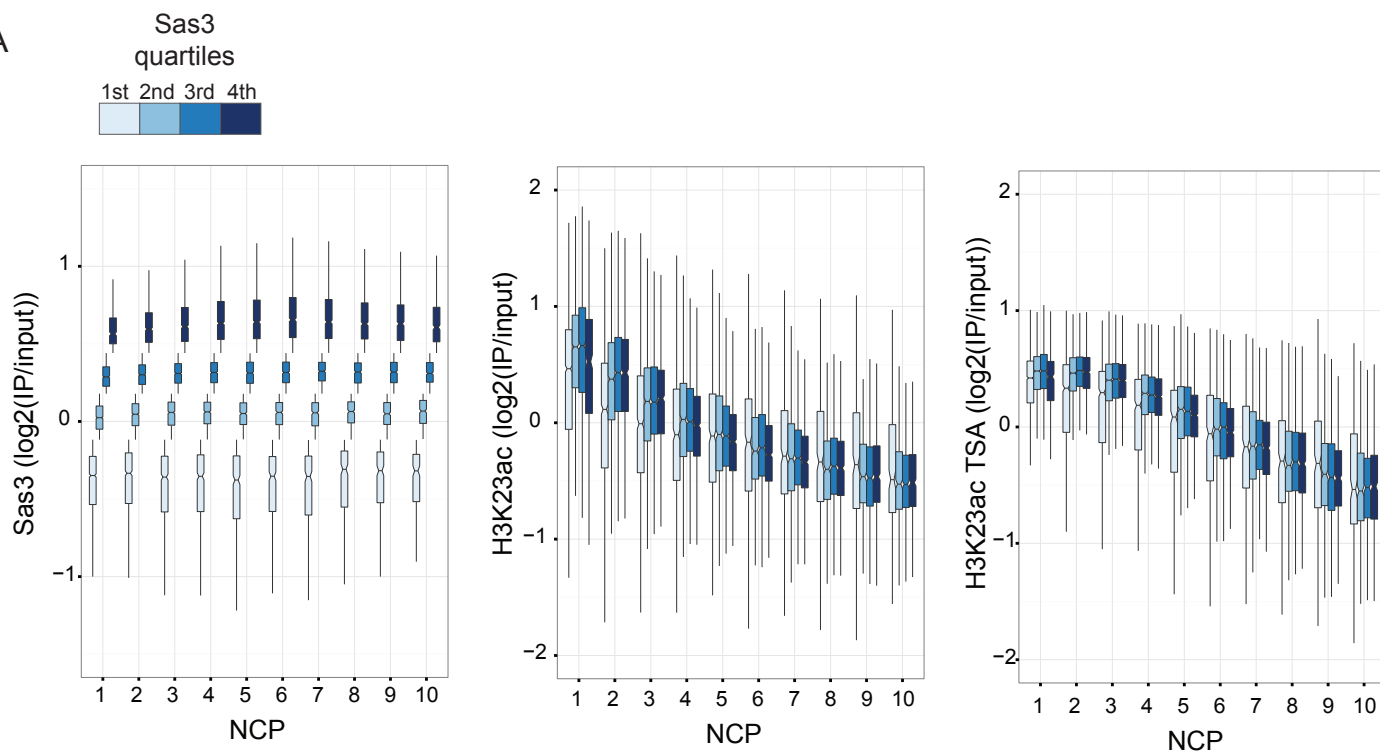

B

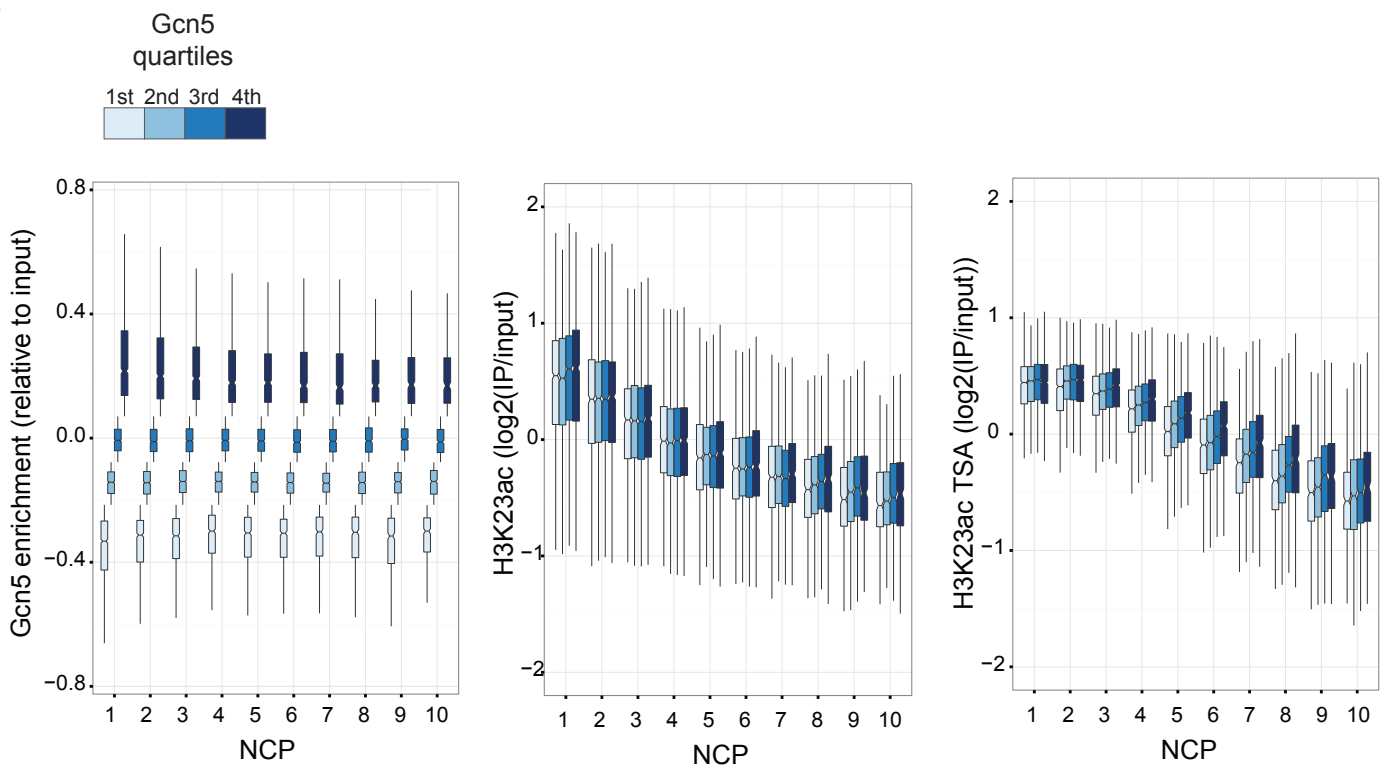

Supplement: 1113FigureS7.pdf [file 1113FigureS7.pdf]

Figure S8

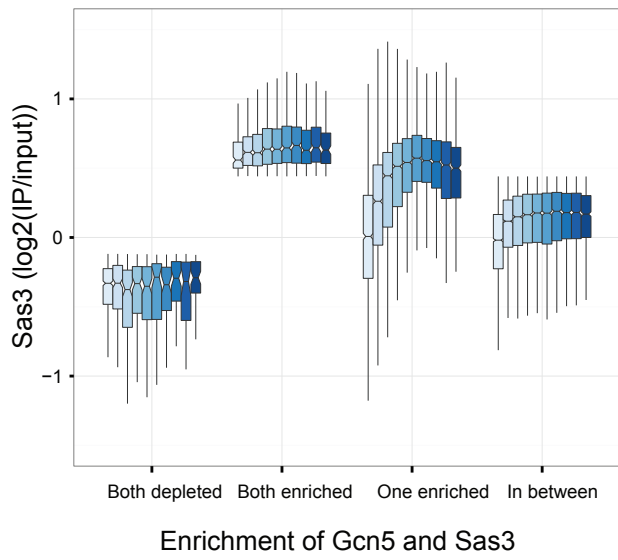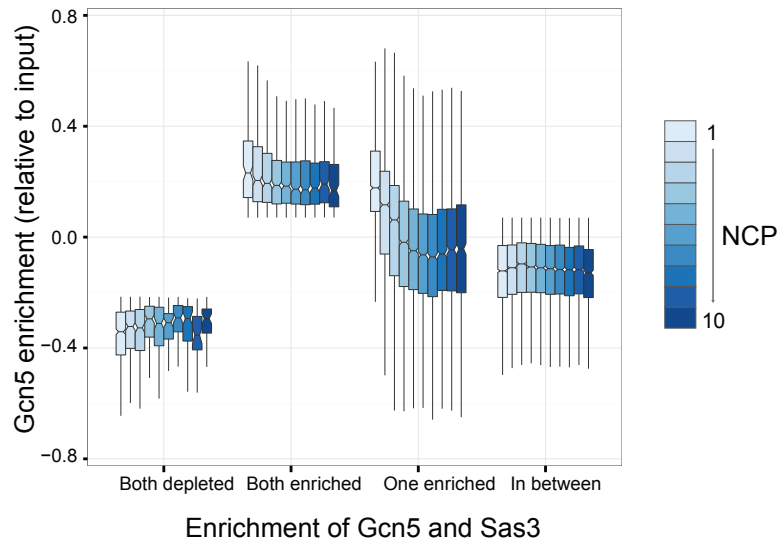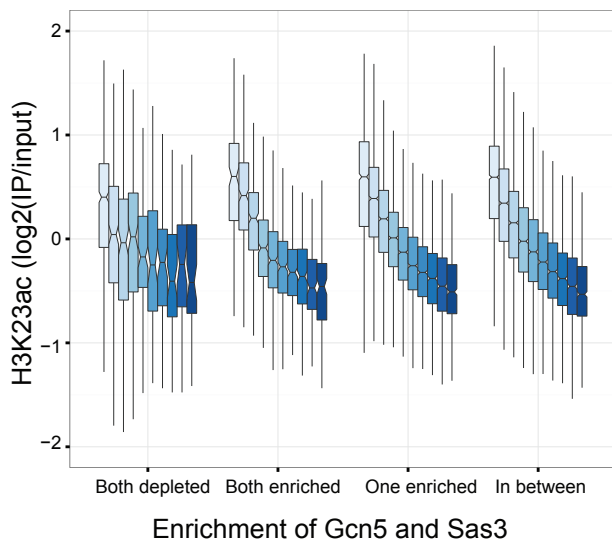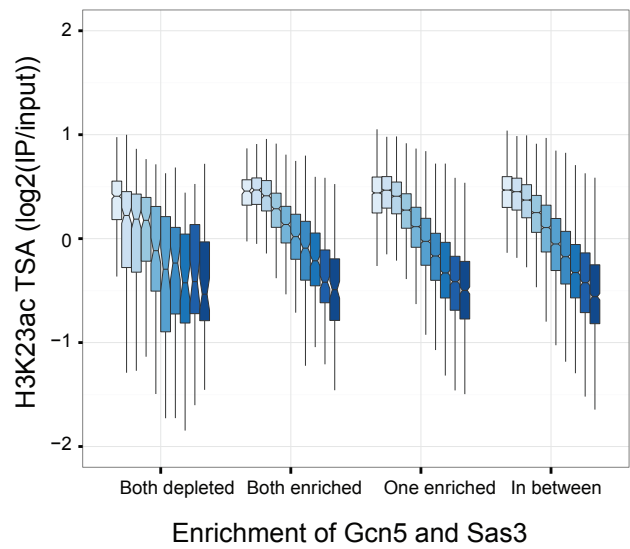

Supplement: 1113FigureS8.pdf [file 1113FigureS8.pdf]
